# Table of Contents

## Introduction

Albrecht Classen

|                                                                                              |    |
|----------------------------------------------------------------------------------------------|----|
| A. Theoretical and Historical Reflections . . . . .                                          | 1  |
| B. Literary Case Studies . . . . .                                                           | 11 |
| C. Criticism of War in Medieval Literature . . . . .                                         | 15 |
| D. Historical Voices Against War and<br>Pragmatic Aspects of War . . . . .                   | 17 |
| E. Attempts to Establish Peace<br>and To Reach out for Toleration or Tolerance (?) . . . . . | 20 |
| F. Severe Criticism of War . . . . .                                                         | 25 |
| G. Philosophical Reflections Upon War . . . . .                                              | 33 |
| H. Research on War and Peace in the Middle Ages<br>and the Early Modern Period . . . . .     | 35 |
| I. Intellectuals' Protest of and Analysis of War . . . . .                                   | 37 |
| J. Critical Summaries of the Contributions . . . . .                                         | 46 |
| K. Conclusion . . . . .                                                                      | 75 |

## Chapter 1

Scott L. Taylor

|                                                                                                                       |    |
|-----------------------------------------------------------------------------------------------------------------------|----|
| The Conquest of Sodom: Symbiosis of Calumny<br>and Canon in the <i>Jus Belli</i> from Ireland to the Indies . . . . . | 81 |
|-----------------------------------------------------------------------------------------------------------------------|----|

## Chapter 2

Ben Snook

|                                                                          |    |
|--------------------------------------------------------------------------|----|
| Just War in Anglo-Saxon England:<br>Transmission and Reception . . . . . | 99 |
|--------------------------------------------------------------------------|----|

## Chapter 3

Sean Pollack

|                                                                       |     |
|-----------------------------------------------------------------------|-----|
| Histories of Violence: The Origins of War in <i>Beowulf</i> . . . . . | 121 |
|-----------------------------------------------------------------------|-----|

**Chapter 4**

Andrew Breeze

Warlords and Diplomats in the *Four Branches of the Mabinogi* . . . . . 155**Chapter 5**

Charles W. Connell

Origins of Medieval Public Opinion in the Peace of God Movement . . . . . 171

**Chapter 6**

Denis Casey

"A Compulsory and Burdensome Imposition":

Billeting Troops in Medieval and Early Modern Ireland . . . . . 193

**Chapter 7**

John A. Dempsey

From Holy War to Patient Endurance: Henry IV,

Matilda of Tuscany, and the Evolution of Bonizo of Sutri's

Response to Heretical Princes . . . . . 217

**Chapter 8**

Susan Small

*Cligés* Un-cut: Some Notes on the Battlefieldsin Chrétien de Troyes' *Cligés* . . . . . 253**Chapter 9**

Zan Kocher

Peace and Love: Communities and Couples

in Old French Romance Plots . . . . . 277

**Chapter 10**

Kiril Petkov

Kiss and Make Up? Ritual Peacemaking

in Frankish Morea and Its Narrative Reflections . . . . . 293

**Chapter 11**

Albrecht Classen

The Power of Sermons in War and Peace:

The Example of Berthold of Regensburg . . . . . 313

**Chapter 12**

Glenn Kumhera

Promoting Peace in Medieval Siena:

Peacemaking Legislation and Its Effects ..... 333

**Chapter 13**

Yuri Fuwa

A “Just War”? A Further Reassessment of

the Alliterative *Morte Arthure* ..... 349**Chapter 14**

Carolyn P. Collette

Waging Spiritual War: Philippe de Mézières,

*The Order of the Passion* and the Power of Performance ..... 377**Chapter 15**

Angus J. Kennedy

Christine de Pizan’s *Epistre a la reine*:

A Woman’s Perspective on War and Peace? ..... 395

**Chapter 16**

William C. McDonald

Armed Conflict as a Deadly Sin:

Michel Beheim’s Verses on Wrath (1454–ca.1470) ..... 425

**Chapter 17**

Joan Tasker Grimbert

Love and War in the Fifteenth-Century Burgundian Prose *Cligés*:

The Duke of Saxony’s Passion for Fenice ..... 443

**Chapter 18**

George Arabatzis

Sailing Away from Byzantium:

Renaissance Crusade Literature and the Peace Plans ..... 463

**Chapter 19**

Jörn Münkner

The Art of Defying the Enemy:

Albrecht Dürer’s Concept of the *Ars fortificatoria* ..... 491

**Chapter 20**

Albrecht Classen

Sixteenth-Century Protests Against War and Its Tragic Consequences:  
 The Testimony of Hans Sachs and His Contemporaries ..... 517

**Chapter 21**

John Campbell

Racine's Holy Wars ..... 541

**Chapter 22**

Martha Moffitt Peacock

Out of the Kitchen and into the Fire:  
 The Dutch Heroine Tradition ..... 557

**Chapter 23**

Heidi J. Holder

The Animal Actor and the Spectacle of Warfare:  
 Lewis's *Timour the Tartar* at Covent Garden ..... 599

List of Illustrations ..... 619

Contributors ..... 623

Index ..... 631
